## Correction: Ablating all three retinoblastoma family members in mouse lung leads to neuroendocrine tumor formation

Sara Lázaro, Miriam Pérez-Crespo, Ana Belén Enguita, Pilar Hernández, Jesús Martínez-Palacio, Marta Oteo, Julien Sage, Jesús M. Paramio and Mirentxu Santos

Copyright: Lázaro et al. This is an open-access article distributed under the terms of the Creative Commons Attribution License 3.0 (CC BY 3.0), which permits unrestricted use, distribution, and reproduction in any medium, provided the original author and source are credited.

**Present:** The grant support section is incomplete.

**Correct:** The complete grant support information appears below.

Original article: Oncotarget. 2017; 8:4373-4386. <https://doi.org/10.18632/oncotarget.13875>

### FUNDING

Funds from Fondo Europeo de Desarrollo Regional (FEDER) and by grants from the Ministry of Economy and Competitiveness of Spain (AES grants ISCIII-FIS PI12/01959 and PI15/00993 to M. Santos; ISCIII-RETIC RD12/0036/0009, ISCIII PIE15/00081, MINECO grants SAF2012–34378 and SAF2015–66015-R to J.M. Paramio) and Comunidad Autónoma de Madrid grant S2010/BMD- 2470 (Oncocycle Program) to J.M. Paramio.
